## RESEARCH ARTICLE

# Respiratory health and chronic disease risks in residents of agricultural areas in Chiang Mai, Northern Thailand

Anurak Wongta<sup>1,2\*</sup>, Supansa Pata<sup>3</sup>, Kriangkrai Chawansuntati<sup>2</sup>, Supachai Yodkeeree<sup>4</sup>, Surat Hongsibsong<sup>1,2</sup>, Woottichai Khamduang<sup>3\*</sup>

**1** School of Health Science Research, Research Institute for Health Sciences, Chiang Mai University, Chiang Mai, Thailand, **2** Research Institute for Health Sciences, Chiang Mai University, Chiang Mai, Thailand, **3** Department of Medical Technology, Faculty of Associate Medical Science, Chiang Mai University, Chiang Mai, Thailand, **4** Department of Biochemistry, Faculty of Medicine, Chiang Mai University, Chiang Mai, Thailand

\* [anurak.wongta@cmu.ac.th](mailto:anurak.wongta@cmu.ac.th) (AW), [woottichai.k@cmu.ac.th](mailto:woottichai.k@cmu.ac.th) (WK)

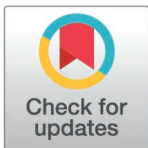

## OPEN ACCESS

**Citation:** Wongta A, Pata S, Chawansuntati K, Yodkeeree S, Hongsibsong S, Khamduang W (2025) Respiratory health and chronic disease risks in residents of agricultural areas in Chiang Mai, Northern Thailand. PLoS ONE 20(4): e0321471. <https://doi.org/10.1371/journal.pone.0321471>

**Editor:** George Kuryan, Christian Medical College, INDIA

**Received:** September 25, 2024

**Accepted:** March 6, 2025

**Published:** April 4, 2025

**Copyright:** © 2025 Wongta et al. This is an open access article distributed under the terms of the [Creative Commons Attribution License](https://creativecommons.org/licenses/by/4.0/), which permits unrestricted use, distribution, and reproduction in any medium, provided the original author and source are credited.

**Data availability statement:** All relevant data are within the manuscript and its [Supporting Information](#) files.

**Funding:** The author(s) received no specific funding for this work.

**Competing interests:** The authors declare that they have no competing interests.

## Abstract

Respiratory health and chronic disease risks are prevalent concerns in agricultural communities in Northern Thailand, prompting an assessment of these issues among residents in Chiang Mai. A cross-sectional study involving 145 participants was conducted in San Pa Tong District from October to December 2023, utilizing structured questionnaires and spirometry tests to evaluate lung function and chronic health disease risk. The study found that education and income significantly impacted lung function, with better FVC% and FEV1/FVC% predicted values observed in those with primary education and lower income. Lower DM risk was associated with better lung function ( $P = 0.023$ ). Logistic regression showed a significant increase in lung function impairment among participants with high to very high DM risk (aOR 9.06,  $p < 0.05$ ). High CV and COPD risk levels also correlated with lung function impairment, though not all results were statistically significant. The results emphasize the intricate interplay between socioeconomic factors, chronic disease risks, and lung function, advocating for public health interventions that holistically address population respiratory and metabolic health.

## Introduction

Agriculture in Northern Thailand plays a crucial role in the economy by supporting various crops and livestock farming activities [1]. These activities, however, pose significant health hazards, including respiratory complications and persistent ailments such as diabetes mellitus (DM), cardiovascular disease (CVD), and chronic obstructive pulmonary disease (COPD). The burning of agricultural residue releases air pollutants that can cause acute cardiopulmonary illnesses, necessitating the implementation of effective policies to address this issue [2,3]. Previous research has shown that poor working conditions affect farmers' quality of life, highlighting the need for improvements in occupational safety [4]. A combination of climate data, socioeconomic factors, and crop suitability assessments is crucial for developing strategies to minimize the effects of climate variability on crop yield and farm profits [1].

Respiratory health issues are a significant concern in agricultural communities owing to various occupational hazards, including exposure to pesticides, organic dust, animal dander, and other airborne particulates [5,6]. Seasonal variations in air quality, particularly high levels of particulate matter (PM) 2.5, exacerbate respiratory conditions on farms and ranch operators. Research has linked agricultural work to respiratory ailments, highlighting the need for further research on health outcomes in this population [6–8]. Effective preventive measures and respiratory protection strategies are essential for safeguarding respiratory health.

Chronic diseases such as DM, CVD, and COPD significantly impact an individual's quality of life and overall health due to a complex interplay of genetic, environmental, and lifestyle factors [9,10]. In agricultural communities, the risk of developing these chronic conditions is heightened due to occupational exposure and intertwined lifestyle choices [11]. Studying disease rates and risks in farming is important for creating effective public health strategies and improving health outcomes. Addressing specific challenges in agricultural environments enables the development of targeted strategies to enhance the community health and well-being [12].

Chronic exposure to PM2.5 is linked to declining lung function and exacerbation of noncommunicable diseases (NCDs), such as COPD. PM2.5, composed of elements like arsenic, nickel, and vanadium, contributes to DNA methylation and inflammation, thereby reducing lung function parameters such as forced expiratory volume in the first second (FEV1) and forced vital capacity (FVC) [13]. In COPD patients, PM2.5 exacerbates lung inflammation and fibrosis, increasing inflammatory cytokines and collagen deposition [14]. Long-term exposure to PM2.5, and its components, such as black carbon and nitrate, are associated with more outpatient visits and hospitalizations, indicating a wider public health impact [15]. While physical activity can benefit COPD patients, it also raises exposure to PM2.5 and ozone (O3). However, physical activity may mitigate the adverse effects of nitrogen dioxide (NO2) on lung function [16].

Despite these recognized issues, comprehensive data on respiratory health and chronic disease risks in Chiang Mai's agricultural areas are limited. This cross-sectional study aims to assess respiratory function and chronic disease risk scores, and their correlation with spirometry results. The findings are intended to guide public health policies and interventions, identifying high-risk groups for health promotion and disease prevention efforts.

## Materials and methods

### Apparatus

Spirometry examinations were conducted utilizing a Spirometer device (SpiroScout, Gan-shorn, UK).

The VITROS XT7600 analyzer (CardinalHealth, USA) was employed for the analysis of blood glucose and cholesterol concentrations.

### Target participants

This cross-sectional study was conducted between October 30 and December 30, 2023, in the San Pa Tong District of Chiang Mai, Thailand. The G\*Power 3.1 software was utilized to calculate the number of participants. To achieve a study power of 95% with a Type I error rate of 0.05, and an effect size of 0.3, indicating a required sample size of 134 individuals. We enrolled 145 participants to account for potential spirometry test failures and incomplete responses. Participants aged 18 and above were recruited through convenience sampling based on inclusion criteria and willingness to participate. Data was collected through structured questionnaires administered during face-to-face interviews. The survey gathered comprehensive information on demographic characteristics, DM risk scores, CV risk scores, COPD risk scores, and spirometry results.

## Ethics approval and consent to participate

This study was approved by the ethics review board before data collection (Doc No. AMSEC-66EX-062) from the Faculty of Associate Medical Technology, Chiang Mai University. Consent was obtained from all participants after receiving comprehensive information regarding the study, and their agreement was documented in written form.

## Data collection

**Questionnaires survey.** Trained research assistants conducted face-to-face interviews using structured questionnaires, which were systematically organized into four key sections to gather a comprehensive range of data:

1. **Demographics:** This foundational section collected essential background information about the participants, including age, sex, educational level, and farming experience.
2. **DM Risk Scores:** The risk of diabetes was assessed using the Thai Diabetes Risk Score, which considers factors such as age, body mass index (BMI), waist circumference, blood pressure, glucose level, and family history of diabetes. This score helps identify individuals at high risk of developing diabetes [17].
3. **CV Risk Scores:** The risk of cardiovascular diseases was measured using the Thai Cardiovascular Risk Score. This score includes variables such as age, sex, smoking status, blood pressure, and cholesterol levels. This aids in evaluating the likelihood of future cardiovascular events and guides preventive measures [18].
4. **COPD Risk Scores:** The risk of COPD was evaluated using the COPD Assessment Test (CAT). This score is instrumental in identifying individuals who may benefit from early intervention to prevent or manage COPD [19].

**Blood collection.** Venipuncture was performed to collect 10 ml of blood from each participant. Trained medical personnel carried out the blood collection under sterile conditions. The blood samples were then processed and analyzed for glucose and cholesterol levels using a VITROS XT7600 analyzer.

## Spirometry procedure

The FVC maneuver was performed using standardized procedures and calibrated spirometers. Participants were instructed to avoid large meals, vigorous exercise, and smoking for at least two hours before the test. Seated comfortably and using a nose clip, participants received detailed instructions and demonstrations. The procedure involved taking a deep breath to full lung capacity and forcefully exhaling into the spirometer. The FVC, FEV1, and the FEV1/FVC ratio were calculated. Each participant performed the maneuver at least three times, and the highest FVC and FEV1 values were recorded. Acceptable maneuvers were artifact-free, had a rapid start, and featured smooth, continuous exhalation, ensuring the differences between the largest and second-largest FVC and FEV1 values were within 150 ml. Spirometry data were used to classify lung function into normal, and impaired lung function including both restrictive and obstructive patterns to identify respiratory issues.

## Data analysis

Data were analyzed using SPSS v20, and descriptive statistics were used to summarize the participant demographics and chronic health risk group. Spirometry results were analyzed using the Mann-Whitney U Test and Kruskal-Wallis Test based on demographics and health risk

levels. Health risk levels and lung function impairment results were examined using logistic regression analysis and found to be significant at p-value ( $P$ ) < 0.05.

## Result

The demographic characteristics of the 145 participants (78% women and 32% men) were presented in [Table 1](#). The majority were under 61 years of age (52%) followed by those in the older age group (48%). Most had a primary education (58%), while the remaining 42% had education levels higher than primary school. The income distribution ranged from less than 5,000 Baht per month (52%) to more than 5,000 Baht per month (48%). Occupational status included agricultural workers (27%) and nonworkers (73%). The prevalence of chronic health risk showed the most common groups were those with moderate to high risk diabetes (33%), Low risk CV (72%), and low-risk COPD risk group (90%).

The spirometry findings indicated significant variances associated with demographic traits and chronic disease risk as shown in [Table 2](#). Men had a lower median FVC% predicted (89.90) than women (91.14), though not statistically significant ( $P = 0.61$ ). Participants aged 60 or younger exhibited a slightly lower FVC% predicted (90.11) than older individuals (92.29),  $P = 0.774$ . Education level was associated with FVC% predicted, with primary school graduates showing higher values (93.51) than those with greater education (87.81),  $P = 0.020$ . However, as this study is cross-sectional, this association does not imply causation. The relationship may be influenced by underlying contextual and environmental factors such as occupational exposure, socioeconomic status, or healthcare access. Income also significantly affected lung function, as those earning below 5,000 Baht per month had higher FEV1/FVC%

**Table 1. Demographic characteristics of study participants (N = 145).**

| Demographical characteristic |                            | Frequency n (%) |
|------------------------------|----------------------------|-----------------|
| Sex                          | Man                        | 32 (22)         |
|                              | Woman                      | 113 (78)        |
| Age (years)                  | ≤ 60                       | 76 (52)         |
|                              | > 60                       | 69 (48)         |
| Education levels             | Primary school             | 84 (58)         |
|                              | Higher than primary school | 61 (42)         |
| Income (Baht/Month)          | ≤5,000                     | 75 (52)         |
|                              | >5000                      | 70 (48)         |
| Agricultural worker          | No                         | 106 (73)        |
|                              | Yes                        | 39 (27)         |
| DM risk level                | Low risk                   | 34 (24)         |
|                              | Low to moderate risk       | 29 (20)         |
|                              | Moderate to high risk      | 48 (33)         |
|                              | High risk                  | 16 (11)         |
|                              | Very high risk             | 18 (12)         |
| CV risk level                | Low risk                   | 109 (72)        |
|                              | Moderate risk              | 30 (20)         |
|                              | High risk                  | 4 (3)           |
|                              | Very high risk             | 2 (1)           |
| COPD risk level              | Low risk                   | 137 (90)        |
|                              | High risk                  | 8 (5)           |

DM, Diabetes mellitus; CV, Cardiovascular, COPD, Chronic obstructive pulmonary disease.

<https://doi.org/10.1371/journal.pone.0321471.t001>

**Table 2. Distribution of spirometry results among participants by demographic characteristics and chronic disease risk groups (N = 145).**

| Demographical characteristics |                            | Frequency n (%) | Spirometry [median (IQR)] |        |                       |       |                       |        |
|-------------------------------|----------------------------|-----------------|---------------------------|--------|-----------------------|-------|-----------------------|--------|
|                               |                            |                 | FVC% predicted            | P      | FEV1% predicted       | P     | FEV1/FVC % predicted  | P      |
| Sex                           | Man                        | 32 (22)         | 89.90 (81.35-100.04)      | 0.610  | 100.37 (82.90-107.81) | 0.099 | 100.69 (95.08-105.58) | 0.634  |
|                               | Woman                      | 113 (78)        | 91.14 (82.89-96.97)       |        | 90.37 (81.42-101.89)  |       | 102.03 (94.70-106.90) |        |
| Age (years)                   | ≤ 60                       | 76 (52)         | 90.11 (82.32-98.02)       | 0.774  | 92.47 (83.88-102.50)  | 0.588 | 101.00 (95.70-105.62) | 0.246  |
|                               | > 60                       | 69 (48)         | 92.29 (81.65-99.56)       |        | 90.37 (78.47-103.42)  |       | 103.09 (92.05-108.07) |        |
| Education levels              | Primary school             | 84 (58)         | 93.51 (83.06-100.65)      | 0.020* | 90.97 (79.00-103.27)  | 0.707 | 101.86 (93.04-106.35) | 0.422  |
|                               | Higher than primary school | 61 (42)         | 87.81 (81.74-94.33)       |        | 91.71 (84.08-101.93)  |       | 101.63 (96.19-107.06) |        |
| Income (Bath/Month)           | ≤5,000                     | 75 (52)         | 91.11 (81.91-97.64)       | 0.464  | 91.71 (81.37-102.85)  | 0.828 | 103.09 (96.02-107.67) | 0.046* |
|                               | >5000                      | 70 (48)         | 91.38 (82.75-98.76)       |        | 91.87 (83.02-103.21)  |       | 100.34 (94.42-105.09) |        |
| Agricultural worker           | No                         | 106 (73)        | 90.88 (82.38-96.89)       | 0.438  | 92.86 (81.49-102.92)  | 0.534 | 102.03 (95.91-107.36) | 0.100  |
|                               | Yes                        | 39 (27)         | 93.5 (81.48-101.51)       |        | 89.69 (81.6-103.18)   |       | 99.19 (94.44-105.46)  |        |
| DM risk level                 | Low risk                   | 34 (24)         | 95.61 (82.70-105.13)      | 0.023* | 93.21 (83.95-107.31)  | 0.099 | 100.34 (95.00-102.74) | 0.195  |
|                               | Low to moderate            | 29 (20)         | 89.08 (83.52-93.89)       |        | 89.07 (77.39-99.59)   |       | 100.67 (90.47-106.34) |        |
|                               | Moderate to high           | 48 (33)         | 93.51 (83.12-100.54)      |        | 98.78 (81.54-104.73)  |       | 103.08 (94.26-108.03) |        |
|                               | High                       | 16 (11)         | 91.99 (80.32-94.82)       |        | 94.10 (79.87-104.14)  |       | 104.47 (99.34-107.98) |        |
|                               | Very high                  | 18 (12)         | 86.27 (78.03-93.59)       |        | 85.98 (74.89-93.43)   |       | 102.97 (98.20-107.96) |        |
| CV risk level                 | Low                        | 109 (72)        | 91.11 (82.84-98.46)       | 0.827  | 92.17 (82.43-102.77)  | 0.936 | 101.29 (95.07-106.22) | 0.306  |
|                               | Moderate                   | 30 (20)         | 91.70 (78.03-98.28)       |        | 87.75 (76.43-103.70)  |       | 103.76 (95.34-107.95) |        |
|                               | High                       | 4 (3)           | 89.79 (79.35-100.41)      |        | 93.25 (83.66-107.79)  |       | 109.31 (94.76-114.43) |        |
|                               | Very high                  | 2 (1)           | 91.61 (89.72-NC)          |        | 92.94 (82.70-NC)      |       | 95.81 (86.62-NC)      |        |
| COPD risk level               | Low                        | 137 (90)        | 91.12 (82.28-97.38)       | 0.719  | 92.17 (81.67-103.24)  | 0.076 | 102.02 (95.33-106.93) | 0.043* |
|                               | High                       | 8 (5)           | 94.66 (80.90-106.20)      |        | 84.96 (66.33-95.27)   |       | 93.87 (75.09-102.32)  |        |

DM, Diabetes mellitus; CV, Cardiovascular, COPD, Chronic obstructive pulmonary disease, IQR, Inter quartile range,

\*P < 0.05, by Mann Whitney U Test or Kruskal-Wallis Test

<https://doi.org/10.1371/journal.pone.0321471.t002>

predicted ratios (103.09) than their higher-income counterparts (100.34),  $P = 0.046$ . No significant lung function differences were noted between agricultural workers and non-workers. However, participants with lower DM risk displayed improved FVC% predicted values (95.61) compared to higher-risk individuals, with  $P = 0.023$  indicating significance. Differences in CV risk levels were not significant, yet those with low COPD risk had a notably higher FEV1/FVC% predicted ratio (102.02) than the high-risk group (93.87),  $P = 0.043$ .

The logistic regression analysis indicates significant correlations between DM risk, CV risk, and lung function impairment shown in [Table 3](#). Individuals with high to very high DM risk exhibit a significant likelihood of lung function impairment, with an odd ratio (OR) of 11.88 (95% CI at 1.41–100.0) and a significant adjusted odd ratio (aOR) of 9.06 (95% CI at 1.05–78.53,  $p < 0.05$ ). Participants in the high to very high CV risk group showed a significantly increasing risk of lung function impairment, as indicated by an OR of 2.97 (95% CI at 1.12–7.90) and an aOR of 1.84 (95% CI at 0.60–5.69), although this significance was lost post-adjustment. High-risk individuals for COPD showed not statistically significant elevation in lung function impairment risk, with an OR of 4.24 (95% CI at 0.93–19.34) and an aOR of 3.50 (95% CI at 0.62–19.60).

## Discussion

This study investigates associations between respiratory health and chronic disease risk factors among agricultural residents in Chiang Mai, Thailand. Our research uniquely examines this

**Table 3. Logistic regression analysis of lung function and chronic health risk (N = 145).**

| Variable        | Category          | Lung function, n (%) |          |         | Lung function impairment |                    |
|-----------------|-------------------|----------------------|----------|---------|--------------------------|--------------------|
|                 |                   | Normal               | Impaired | Missing | OR (95% CI)              | #aOR (95% CI)      |
| DM risk level   | Low risk          | 33 (91)              | 1 (3)    | 2 (6)   | Ref                      | Ref                |
|                 | Low to moderate   | 26 (90)              | 3 (10)   | –       | 3.81 (0.37–38.78)        | 3.72 (0.36–38.92)  |
|                 | Moderate to high  | 41 (84)              | 7 (14)   | 1 (2)   | 5.63 (0.66–48.12)        | 4.15 (0.47–36.52)  |
|                 | High to very high | 25 (66)              | 9 (24)   | 4 (10)  | 11.88 (1.41–100.0)*      | 9.06 (1.05–78.53)* |
| CV risk level   | Low to moderate   | 98 (87)              | 11 (10)  | 4 (3)   | Ref                      | Ref                |
|                 | High to very high | 27 (69)              | 9 (23)   | 3 (8)   | 2.97 (1.12–7.90)*        | 1.84 (0.60–5.69)   |
| COPD risk level | Low risk          | 120 (83)             | 17 (12)  | 7 (5)   | Ref                      | Ref                |
|                 | High risk         | 5 (62)               | 3 (38)   | –       | 4.24 (0.93–19.34)        | 3.50 (0.62–19.60)  |

DM, Diabetes mellitus; CV, Cardiovascular, COPD, Chronic obstructive pulmonary disease; OR, odds ratio,

\*P < 0.05, by Logistic regression analysis. # Adjust for sex, age, education, and income.

<https://doi.org/10.1371/journal.pone.0321471.t003>

relationship within Northern Thailand's agricultural population, who face distinct occupational exposures, environmental pollutants, and socioeconomic conditions that may affect lung function differently than urban dwellers. By analyzing chronic disease risk scores alongside spirometry results, we provide insights specific to this understudied population. The demographic characteristics of our sample and their potential relationship to respiratory outcomes offer preliminary understanding of health patterns in this community, though convenience sampling limits generalizability. This work contributes to understanding how environmental and occupational factors may influence respiratory health in rural settings, highlighting the need for region-specific health interventions and further research using randomized sampling methods.

The observed gender disparity in lung function, where men exhibit lower forced vital FVC and FEV1/FVC ratios compared to women, aligns with existing literature attributing these differences to physiological and occupational factors, such as heavier physical labor and increased exposure to occupational hazards among men. However, women demonstrate lower FEV1% predicted than men, indicating a complex interplay of factors influencing lung function across genders. Additionally, the observed relationship between age and lung function does not follow the expected pattern of age-related decline seen in previous studies. Individuals over 60 in our study exhibited lung function values that did not show a significant decline, suggesting that other factors, such as long-term adaptation to environmental exposures or selection bias in participant recruitment, may play a role. Further research is needed to explore these discrepancies [20–23]. Overall, these findings underscore the multifaceted nature of lung function disparities, necessitating a nuanced understanding of gender and age-related influences on respiratory health.

In this study, lower-income individuals exhibited unexpectedly favorable spirometry outcomes, particularly in FEV1/FVC% predicted ratios, which diverges from previous findings that associated lower socioeconomic status (SES) with poorer lung function outcomes. This discrepancy may be attributed to the physically demanding nature of agricultural work prevalent among lower-income populations, potentially enhancing lung function through increased physical activity. Additionally, these individuals may experience reduced exposure to air pollutants due to residing in less industrialized areas or engaging in different agricultural practices, which could further benefit lung health. Previous research has shown that higher household income is generally linked to lower risks of pulmonary diseases, such as COPD and asthma, indicating a complex relationship between income and lung function influenced by

occupational, environmental, and lifestyle factors in rural settings [24,25]. Therefore, public health interventions should consider these unique contextual factors to effectively address lung health disparities across various income levels [26,27].

The findings from our studies indicate that individuals with lower DM risk exhibit significantly better lung function, as evidenced by higher FVC% predicted values. This suggests that chronic inflammation and reduced lung elasticity associated with DM adversely affect pulmonary health [28]. Similarly, patients at low risk for COPD demonstrate a notably higher FEV1/FVC ratio compared to those at high risk, highlighting the early onset of airflow limitations in COPD [29]. The presence of comorbidities, such as diabetes and metabolic syndrome, exacerbates respiratory dysfunction, emphasizing the need for integrated care approaches to manage these chronic conditions effectively [30,31]. Our studies collectively underscore the critical importance of managing DM and COPD to preserve lung function and enhance overall health outcomes, advocating for proactive monitoring and intervention strategies in at-risk populations [32].

The logistic regression analysis reinforced the strong association between high DM and CV risk levels and lung function impairment. Relied on several previous studies indicate that chronic inflammation due to DM can lead to significant lung function decline, particularly in individuals with poor glycemic control, as evidenced by a restrictive pattern of lung disease observed in diabetic patients with elevated inflammatory markers [28]. Furthermore, metabolic syndrome (MS) has been linked to increased severity of respiratory dysfunction, with studies showing that individuals with MS exhibit more pronounced lung function impairment compared to those without [29,33]. The presence of MS exacerbates the risk of cardiopulmonary morbidity and mortality, highlighting the critical need for integrated disease management strategies that address both respiratory and metabolic health [34]. This multifaceted approach is essential, as it can potentially mitigate the debilitating effects of these chronic conditions on lung function and overall health [35]. Thus, addressing both DM and CV risks is vital for improving respiratory outcomes in affected populations.

This research elucidates the considerable influence of demographic and health factors on pulmonary function in Chiang Mai's agricultural residents. The observed associations between elevated chronic disease risks and diminished lung performance indicate a significant exacerbation of respiratory health challenges. The results emphasize the necessity for specialized public health initiatives to alleviate chronic disease risks and enhance lung function, with particular attention to older adults and economically disadvantaged groups. Subsequent initiatives should prioritize integrated approaches that address both respiratory and metabolic health to alleviate the compounded vulnerabilities of these at-risk populations.

## Supporting information

**S1 File. Data.** .  
(XLSX)

## Acknowledgments

We gratefully acknowledge support from the Research Institute for Health Science, Chiang Mai University, 50200, Thailand. Department of Medical Technology, Faculty of Associate Medical Science, Chiang Mai University, Chiang Mai 50200, Thailand. Department of Biochemistry, Faculty of Medicine, Chiang Mai University, Chiang Mai 50200, Thailand. Community coordinators and all participants in this study. This research was partially supported by Chiang Mai University

## Author contributions

**Conceptualization:** Anurak Wongta, Woottichai Khamduang.

**Data curation:** Anurak Wongta, Surat Hongsibsong, Woottichai Khamduang, Supachai Yodkeeree.

**Formal analysis:** Anurak Wongta, Woottichai Khamduang.

**Investigation:** Supansa Pata.

**Methodology:** Anurak Wongta, Surat Hongsibsong, Supansa Pata, Woottichai Khamduang, Kriangkrai Chawansuntati, Supachai Yodkeeree.

**Project administration:** Anurak Wongta.

**Supervision:** Surat Hongsibsong, Supansa Pata, Woottichai Khamduang, Kriangkrai Chawansuntati, Supachai Yodkeeree.

**Validation:** Surat Hongsibsong, Supansa Pata, Woottichai Khamduang, Kriangkrai Chawansuntati, Supachai Yodkeeree.

**Writing – original draft:** Anurak Wongta.

**Writing – review & editing:** Anurak Wongta, Woottichai Khamduang.

## References

1. Kyaw Y, Nguyen TPL, Winijkul E, Xue W, Viridis SGP. The effect of climate variability on cultivated crops' yield and farm income in Chiang Mai Province, Thailand. *Climate*. 2023;11(10):204. <https://doi.org/10.3390/cli11100204>
2. Wongsanuphat S, Praekunatham H, Jitpeera C, Thammawijaya P. Association between Air pollution relating to agricultural residue burning and morbidity of acute cardiopulmonary diseases in upper Northern Thailand. *Outbreak Surveillance Investig Response*. 2024;17(1):9–19. <https://doi.org/10.59096/osir.v17i1.265861>
3. Htwe Z, Laohasirivong W, Sornlorm K, Mahato R. Spatial pattern and heterogeneity of chronic respiratory diseases and relationship to socio-demographic factors in Thailand in the period 2016 to 2019. *Geospatial Health*. 2023;18(1)
4. Arsa R, Jumniensuk A, Pathomrotsakun J, Dechboon P. Lity of work life (QoWL) among farmers in Thailand. *J Public Health Dev*. 2023.
5. D. Owisso R, S. Bukalasa J, J. Mwezi R, S. Maleto J, R. Mgonja F, H. Mdegela R. Association between occupational risks of exposure to pesticides and respiratory symptoms among organic and non organic farmworkers. *Am J Epidemiol Infect Dis*. 2022;10(1):31–9. <https://doi.org/10.12691/ajeid-10-1-5>
6. Puvvula J, Baccaglioni L, Johnson A, Du Y, Bell JE, Rautiainen RH. Prevalence and risk factors for pulmonary conditions among farmers and ranchers in the central United States. *J Agromed*. 2022;27(4):378–90. <https://doi.org/10.1080/1059924X.2021.2025180> PMID: 35026966
7. O' Brien C, Kingston L, Plant BJ, Coffey A. Lung Health in farming: a scoping review. *J Agromed*. 2023;28(3):335–45. <https://doi.org/10.1080/1059924X.2023.2178573> PMID: 36773027
8. Clarke K, Manrique A, Sabo-Attwood T, Coker ES. A narrative review of occupational air pollution and respiratory health in farmworkers. *Int J Environ Res Public Health*. 2021;18(8):4097. <https://doi.org/10.3390/ijerph18084097> PMID: 33924663
9. Raj R, Kusuma M. A comprehensive analysis of chronic health diseases using big data. 2023. p. 1–5.
10. Mandili IM, Balobaid AN, Alzahrani HH, Almalki MA, Alghamdi AA, Alaradi RR, et al. Types of chronic diseases associated with sedentary behaviour and physical inactivity. *Int J Community Med Public Health*. 2022;9(10):3965. <https://doi.org/10.18203/2394-6040.ijcmph20222388>
11. Beyer KMM, Namin S. Chapter 12 - Chronic environmental diseases: burdens, causes, and response. In: Sivanpillai R, Shroder JF, editors. *Biological and Environmental Hazards, Risks, and Disasters* (2nd ed). Boston: Elsevier; 2023. p. 223–49.
12. Sahu S, Kumar S, Nagtode NR, Sahu M. "The burden of lifestyle diseases and their impact on health service in India"—a narrative review. *J Family Med Prim Care*. 2024;13(5):1612–9. [https://doi.org/10.4103/jfmpc.jfmpc\\_693\\_23](https://doi.org/10.4103/jfmpc.jfmpc_693_23) PMID: 38948597

13. Fang J, Gao Y, Zhang M, Jiang Q, Chen C, Gao X, et al. Personal PM2.5 elemental components, decline of lung function, and the role of DNA methylation on inflammation-related genes in older adults: results and implications of the BAPE study. *Environ Sci Technol*. 2022;56(22):15990–6000. <https://doi.org/10.1021/acs.est.2c04972> PMID: 36214782
14. Zou W, Liu S, Ye D, Bai G, Guo M, Sun R, et al. PM2.5 induces lung inflammation and fibrosis via airway smooth muscle cell expression of the Wnt5a/JNK pathway. *J Thorac Dis*. 2023;15(11):6094–105. <https://doi.org/10.21037/jtd-23-780> PMID: 38090309
15. Wang S, Ma Y, Wu G, Du Z, Li J, Zhang W, et al. Relationships between long-term exposure to major PM2.5 constituents and outpatient visits and hospitalizations in Guangdong, China. *Environ Pollut*. 2024;348:123866. <https://doi.org/10.1016/j.envpol.2024.123866> PMID: 38537800
16. Chen K, Aglan M, Purcell A, Nurhussien L, Koutrakis P, Coull BA, et al. Physical activity, air pollution exposure, and lung function interactions among adults with COPD. *Chronic Obstr Pulm Dis*. 2023;10(2):170–7. <https://doi.org/10.15326/jcopdf.2022.0385> PMID: 36976544
17. Clinical Practice Guideline for Diabetes 2023, type = webpage 2023. Available from: <chrome-extension://efaidnbmnnnibpcajpcglclefindmkaj/https://www.thaiendocrine.org/th/wp-content/uploads/2023/08/Thai-DM-CPG-2566.pdf>.
18. Guide for Assessing the Risk of Coronary Heart Disease and Stroke (Paralysis and Hemiplegia) for Village Health Volunteers (VHVs). 2017. Available from: <file:///D:/2.All%20of%20Boy%20papers/Pm%20tele%20paper/2560%20%E0%B8%84%E0%B8%B9%E0%B9%88%E0%B8%A1%E0%B8%B7%E0%B8%AD%E0%B8%81%E0%B8%B2%E0%B8%A3%E0%B8%9B%E0%B8%A3%E0%B8%B0%E0%B9%80%E0%B8%A1%E0%B8%B4%E0%B8%99%E0%B9%82%E0%B8%AD%E0%B8%81%E0%B8%B2%E0%B8%AA%E0%B9%80%E0%B8%AA%E0%B8%B5%E0%B9%88%E0%B8%A2%E0%B8%87%20CVD.pdf>.
19. Jones PW, Harding G, Berry P, Wiklund I, Chen W-H, Kline Leidy N. Development and first validation of the COPD Assessment Test. *Eur Respir J*. 2009;34(3):648–54. <https://doi.org/10.1183/09031936.00102509> PMID: 19720809
20. Akbar KA, Chao HJ, Thanvisitthpon N, Wongsasuluk P, Kallawicha K. Chapter 2 - Respiratory diseases caused by air pollutants. In: Dehghani MH, Karri RR, Vera T, Hassan SKM, editors. *Diseases and Health Consequences of Air Pollution*: Academic Press; 2024. p. 27–53.
21. Haouzi P, McCully J. The persistent mismeasure of spirometry in women. *Lancet Respir Med*. 2024;12(5):e31–2. [https://doi.org/10.1016/S2213-2600\(24\)00084-5](https://doi.org/10.1016/S2213-2600(24)00084-5) PMID: 38697725
22. Kirkeleit J, Riise T, Wielscher M, Accordini S, Carsin A-E, Dratva J, et al. Early life exposures contributing to accelerated lung function decline in adulthood - a follow-up study of 11,000 adults from the general population. *EClinicalMedicine*. 2023;66:102339. <https://doi.org/10.1016/j.eclinm.2023.102339> PMID: 38089857
23. Liu Q, Pan L, Yang T, Ou Q, Sun Z, He H, et al. Association between long-term exposure to ambient particulate matter and pulmonary function among men and women in typical areas of South and North China. *Front Public Health*. 2023;11(1):1–10. <https://doi.org/10.1234/example.doi>
24. Xu H, Deng H, Wu Y, Yang Y, Zheng X. Household income unequally affects genetic susceptibility to pulmonary diseases: evidence from bidirectional Mendelian randomization study. *Front Med (Lausanne)*. 2024;11:1279697. <https://doi.org/10.3389/fmed.2024.1279697> PMID: 39026555
25. Alzayed A. Association between lung function of children and their socioeconomic conditions: a systematic review. *Int J Gen Med*. 2024;17:2265–78. <https://doi.org/10.2147/IJGM.S456643> PMID: 38779651
26. Hayanga J, Luo X, Hasasna I, Rothenberg P, Reddy S, Mehaffey J. Intersection of race, rurality, and income in defining access to minimally invasive lung surgery. *Ann Thorac Surg*. 2024.
27. Fernandes M, Milla C, Gubran A, Barrazueta S, Altonen B, DiVittis A, et al. Assessing the impact of socioeconomic status on incidental lung nodules at an urban safety net hospital. *BMC Pulm Med*. 2023;23(1):469. <https://doi.org/10.1186/s12890-023-02726-8> PMID: 37996867
28. Kaur R, Uppal N, Uppal V, Sharma A. Impaired glycemic control as a risk factor for reduced lung function in the Indian diabetic population. *Monaldi Arch Chest Dis*. 2024.
29. Streba L, Popovici V, Mihai A, Mititelu M, Lupu CE, Matei M, et al. Integrative approach to risk factors in simple chronic obstructive airway diseases of the lung or associated with metabolic syndrome-analysis and prediction. *Nutrients*. 2024;16(12):1851. <https://doi.org/10.3390/nu16121851> PMID: 38931206
30. Almagro P, Soler-Cataluña JJ, Huerta A, González-Segura D, Cosío BG, CLAVE Study Investigators. Impact of comorbidities in COPD clinical control criteria. The CLAVE study. *BMC Pulm Med*. 2024;24(1):6. <https://doi.org/10.1186/s12890-023-02758-0> PMID: 38166965

31. James BD, Greening NJ, Tracey N, Haldar P, Woltmann G, Free RC, et al. Prognostication of co-morbidity clusters on hospitalisation and mortality in advanced COPD. *Respir Med*. 2024;222:107525. <https://doi.org/10.1016/j.rmed.2023.107525> PMID: [38182000](https://pubmed.ncbi.nlm.nih.gov/38182000/)
32. Kim T, Shin SH, Kim H, Im Y, Cho J, Kang D, et al. Longitudinal BMI change and outcomes in chronic obstructive pulmonary disease: a nationwide population-based cohort study. *Respir Res*. 2024;25(1):150. <https://doi.org/10.1186/s12931-024-02788-0> PMID: [38555459](https://pubmed.ncbi.nlm.nih.gov/38555459/)
33. Pukazhenthil K, Divya K, Srivijayan A, Grace J. Prevalence and severity of metabolic syndrome in COPD patients – a cross sectional observational study. *Int J Med Arts*. 2024;6(4):4338–46.
34. Marott JL, Ingebrigtsen TS, Çolak Y, Kankaanranta H, Bakke PS, Vestbo J, et al. Impact of the metabolic syndrome on cardiopulmonary morbidity and mortality in individuals with lung function impairment: a prospective cohort study of the Danish general population. *Lancet Reg Health Eur*. 2023;35:100759. <https://doi.org/10.1016/j.lanepe.2023.100759> PMID: [38023334](https://pubmed.ncbi.nlm.nih.gov/38023334/)
35. Mihai A, Mititelu M, Matei M, Lupu EC, Streba L, Vladu IM, et al. Assessment of behavioral risk factors in chronic obstructive airway diseases of the lung associated with metabolic syndrome. *J Clin Med*. 2024;13(4):1037. <https://doi.org/10.3390/jcm13041037> PMID: [38398353](https://pubmed.ncbi.nlm.nih.gov/38398353/)
